# Supplementary material
Source: publisher figshare collection journal article supplement (https://springernature.figshare.com/ndownloader/files/8411258)
Supplement: Supplementary file [file 8411258]

**Post-Cataract Subjective Discomfort Index Questionnaire (Cat-SDI-Q) ver.1.1**

- 1. Please evaluate the foreign body sensation in your eye. Use the scale from 1 (severe) to 10 (none).**

1      2      3      4      5      6      7      8      9      10

---

*similar to a  
sensation of a  
hot ember in  
the eye*

*similar to the  
sensation of  
sand or dust in  
the eye*

*similar to  
sensation of fine  
dust or powder  
in the eye*

- 2. Please evaluate the tearing discomfort of the eye. Use a scale from 1 (severe) to 10 (none).**

1      2      3      4      5      6      7      8      9      10

---

*constant or  
nearly  
constant  
spilling of tears  
over the lid  
margin.*

*infrequent or  
intermittent  
spilling of tears  
over the lid  
margin.*

*positive sensation of  
fullness of the  
conjunctival sac  
without tears  
spilling over the lid  
margin*

- 3. Please evaluate potential pain or discomfort that you experience when blinking your eyes. Use scale from 1 (severe) to 10 (none)**

1      2      3      4      5      6      7      8      9      10

---

*Very intense  
discomfort or  
pain. I want to  
keep my eyes  
closed most of  
the time*

*I feel pain or  
discomfort  
that interferes  
with my visual  
capacity and  
makes me  
frustrated*

*I feel very  
rarely a vague  
discomfort  
that does not  
interfere with  
my visual  
capacity*

- 4. Please evaluate potential stinging sensation that you experience. Use scale from 1 (severe) to 10 (none)**

1      2      3      4      5      6      7      8      9      10

---

*Very intense  
stinging  
sensation. I  
want to keep  
my eyes closed  
most of the  
time*

*I have that  
stinging  
sensation  
several times  
per day. It  
makes me  
frustrated*

*I have very  
rarely a  
stinging  
sensation. It  
doesn't make  
me worry*
